# Supplementary material for: Response to crizotinib + regorafenib + PD-1 inhibitor in a metastatic BRAF V600E MT colon cancer patients with acquired C-MET amplification and TPM4- ALK fusion: case report and review of literature
Source: Research Square preprint supplement (doi:10.21203/rs.3.rs-2325340/v1), 2022-12-06
Supplement: Supplementary file 1 [file 1f65877f23e300c873cf78e9.xlsx]

## Sheet: Table 2
Table 2. Measurements of biochemical marker levels at different follow-up times.
Biomarker	2021-02-01	2021-03-01	2021-04-01	2021-05-01
TBIL	81.6	39.2	23.4	18.9
DBIL	61.2	27.3	13.2	8.3
TBA	78.7	3.4	2.9	5.2
GGT	1521	914	507	425
TBIL, total bilirubin. DBIL, Direct Bilirubin. TBA, total bile acid. GGT, glutamyltranspeptidase.
