# Supplementary material for: Response to crizotinib + regorafenib + PD-1 inhibitor in a metastatic BRAF V600E MT colon cancer patients with acquired C-MET amplification and TPM4- ALK fusion: case report and review of literature
Source: Research Square preprint supplement (doi:10.21203/rs.3.rs-2325340/v1), 2022-12-06
Supplement: Supplementary file 2 [file d46d288e885cc195ae5c105e.xlsx]

## Sheet: Table 1
Table 1. Measurements of serum tumor marker (TW) levels at different follow-up times.
Biomarker	2020-10-01	2020-11-01	Dec-2020-1st	Dec-2020-2rd	Jan-2021-1st	Jan-2021-2rd	Feb-2021--1st	Feb-2021-2rd	Feb-2021-3rd	2021-03-01	2021-04-01	2021-05-01	2021-06-01
CEA	46.3	136.1	27.8	11.7	3.8	2.8	3.8	7.1	9.4	11.2	10.7	16.9	17
CA199	12000	12000	12000	10902	3946	10816	12000	>12000	>12000	>12000	4129	>12000	3546.1
CA125	932	1713	488	227	178	331	659	1361	1320	577	104	134	95.4
